# Supplementary material for: Urinary phytoestrogens and the risk of uterine leiomyomata in US women
Source: Springer Nature journal article supplement (doi:10.1186/s12905-023-02381-5), 2023-05-13

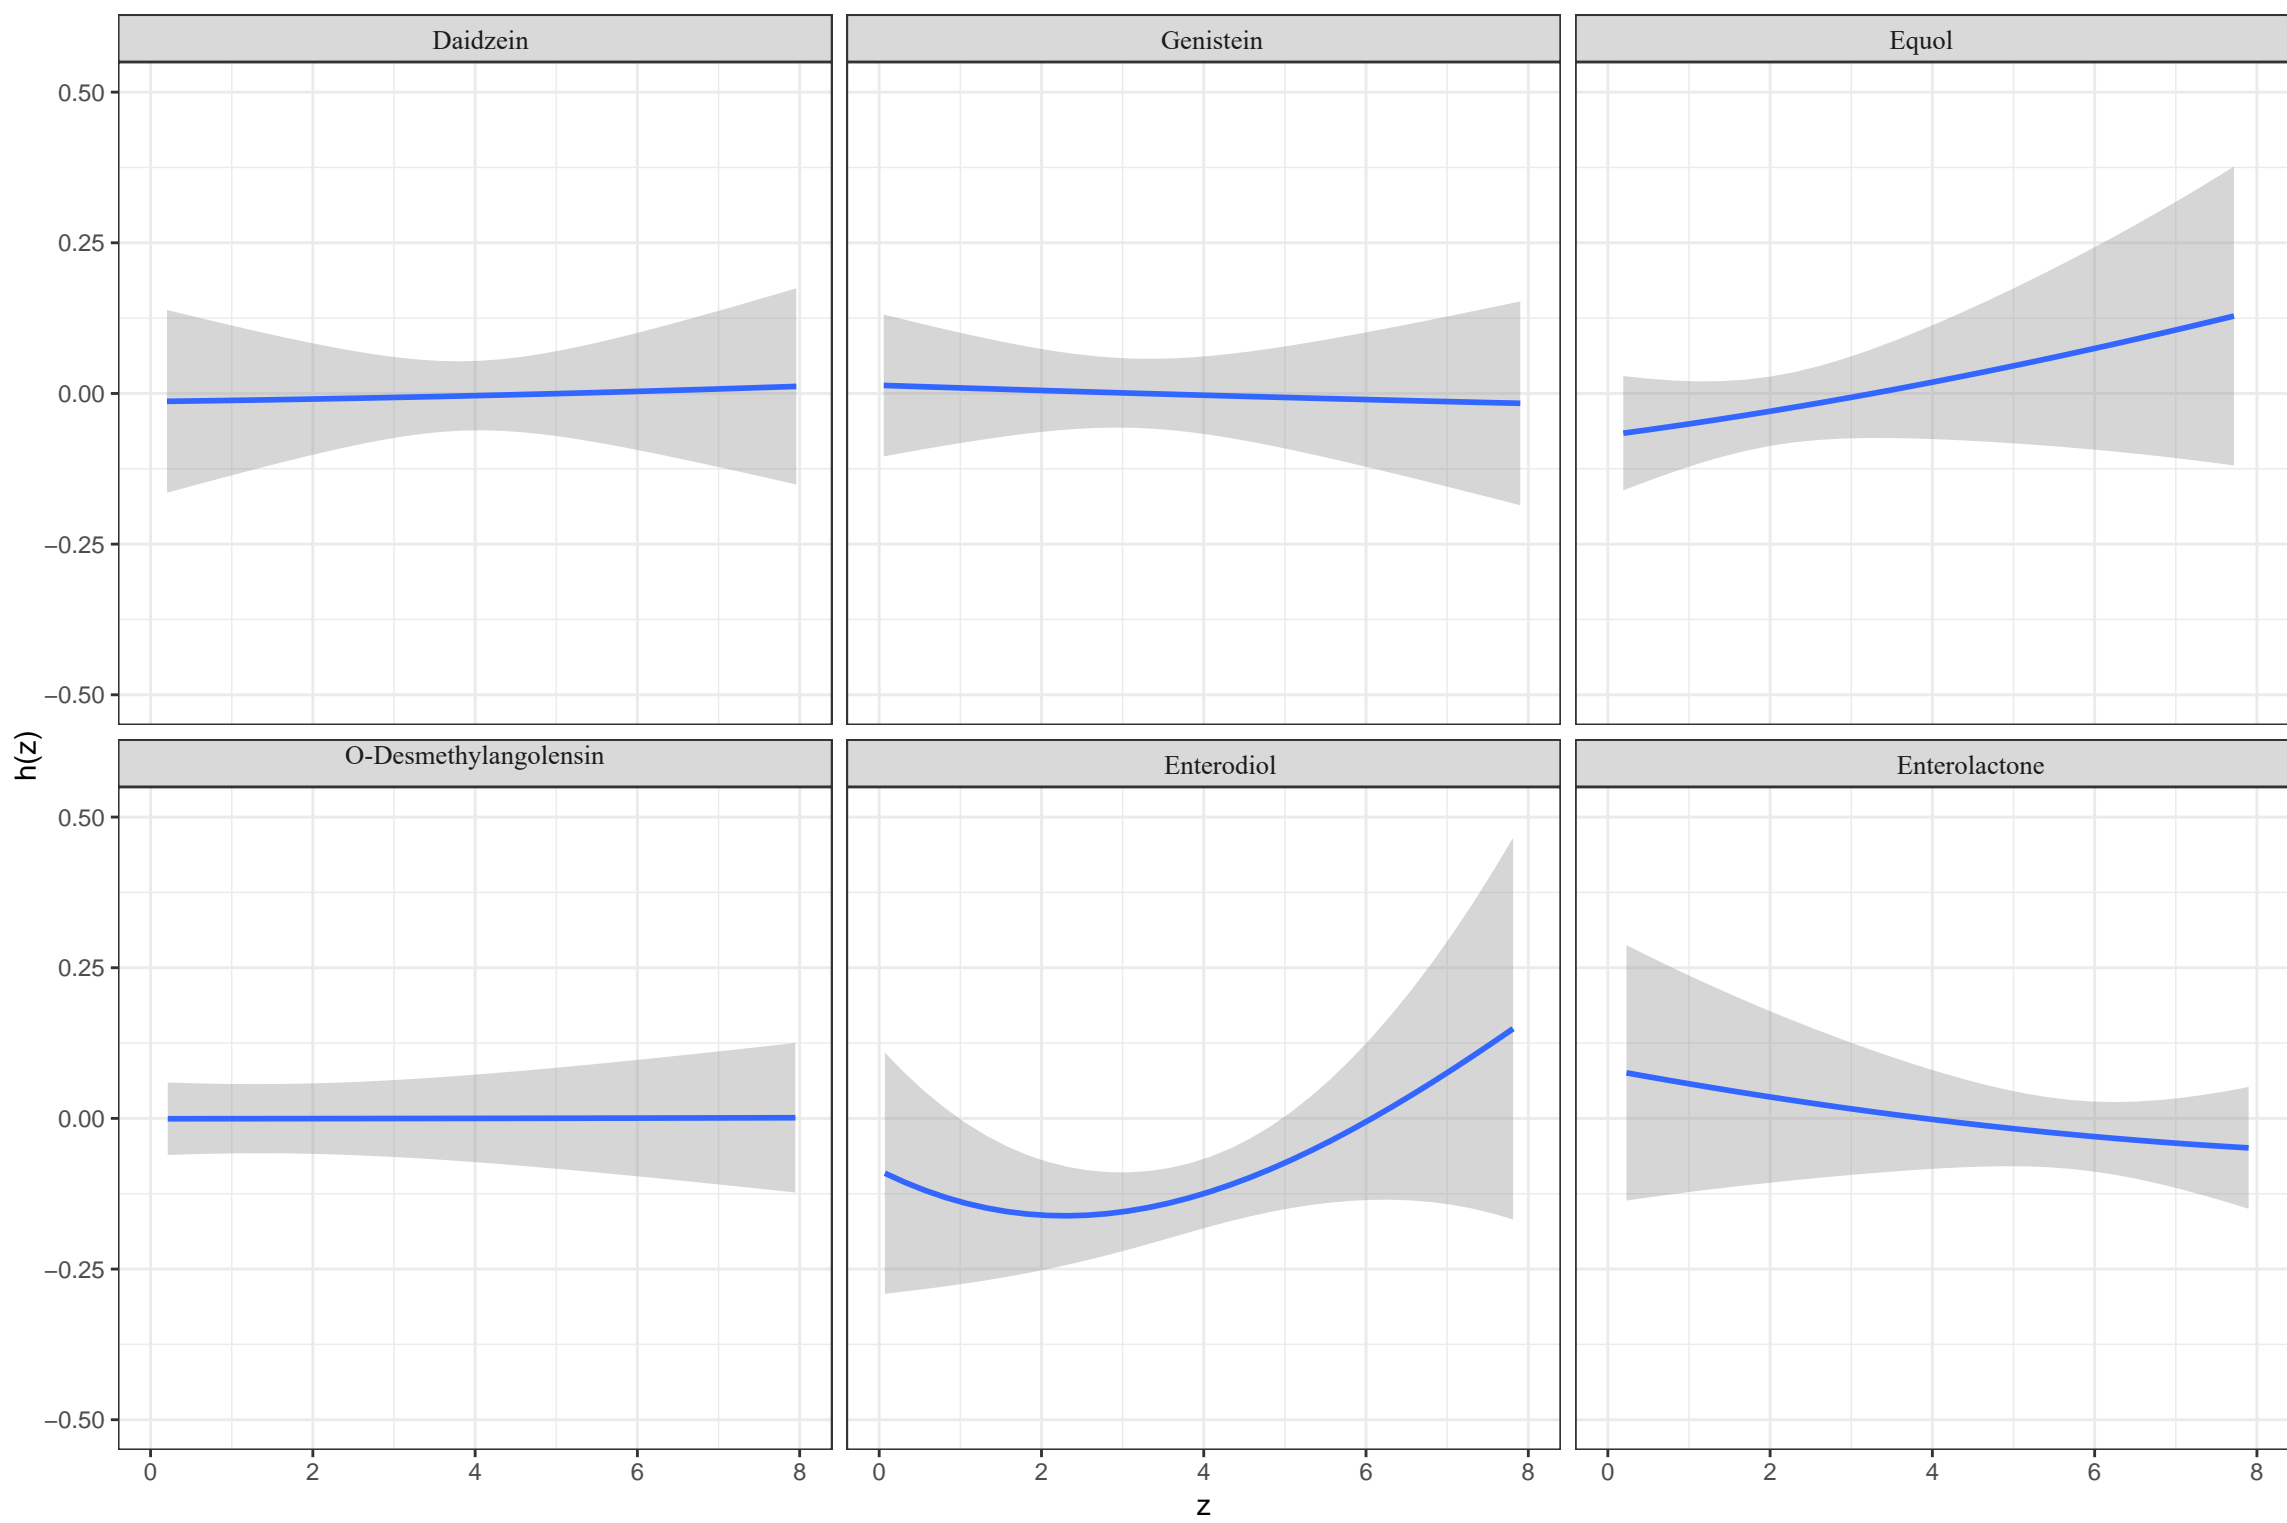

Supplement: MOESM2 [file 25356660]
